# Supplementary material for: The discovAIR project: a roadmap towards the Human Lung Cell Atlas
Source: PubMed Central journal article supplement — Eur Respir J. 2022 Aug 18;60(2):2102057. doi: 10.1183/13993003.02057-2021 (PMC9386332; doi:10.1183/13993003.02057-2021), 2022-08-18
Supplement: ERJ-02057-2021.Shareable.pdf [file ERJ-02057-2021.Shareable.pdf]

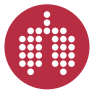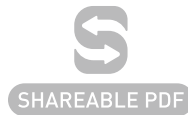

# The discovAIR project: a roadmap towards the Human Lung Cell Atlas

Malte D. Luecken<sup>1,26</sup>, Laure-Emmanuelle Zaragosi<sup>1b 2,26</sup>, Elo Madisson<sup>3,4,26</sup>, Lisa Sikkema<sup>1b 1,26</sup>, Alexandra B. Firsova<sup>5,26</sup>, Elena De Domenico<sup>6,26</sup>, Louis Kümmerle<sup>1,26</sup>, Adem Saglam<sup>6,26</sup>, Marijn Berg<sup>7,8,26</sup>, Aurore C.A. Gay<sup>7,8,26</sup>, Janine Schniering<sup>1b 9,26</sup>, Christoph H. Mayr<sup>9,26</sup>, Xesús M. Abalo<sup>1b 10,26</sup>, Ludvig Larsson<sup>10,26</sup>, Alexandros Sountoulidis<sup>5,26</sup>, Sarah A. Teichmann<sup>3,11</sup>, Karen van Eunen<sup>12,13</sup>, Gerard H. Koppelman<sup>1b 8,12</sup>, Kouros Saeb-Parsy<sup>14</sup>, Sylvie Leroy<sup>15</sup>, Pippa Powell<sup>16</sup>, Ugis Sarkans<sup>4</sup>, Wim Timens<sup>1b 7,8</sup>, Joakim Lundeberg<sup>17</sup>, Maarten van den Berge<sup>8,18</sup>, Mats Nilsson<sup>10</sup>, Peter Horváth<sup>19</sup>, Jessica Denning<sup>16</sup>, Irene Papatheodorou<sup>4</sup>, Joachim L. Schultze<sup>6,20,21</sup>, Herbert B. Schiller<sup>9</sup>, Pascal Barbry<sup>1b 2</sup>, Ilya Petoukhov<sup>22</sup>, Alexander V. Misharin<sup>23</sup>, Ian M. Adcock<sup>1b 24</sup>, Michael von Papen<sup>25</sup>, Fabian J. Theis<sup>1</sup>, Christos Samakovlis<sup>5</sup>, Kerstin B. Meyer<sup>3</sup> and Martijn C. Nawijn<sup>1b 7,8</sup>

<sup>1</sup>Helmholtz Zentrum München, German Research Center for Environmental Health, Institute of Computational Biology, Neuherberg, Germany. <sup>2</sup>Université Côte d'Azur and CNRS, Institut de Pharmacologie Moléculaire et Cellulaire, Sophia Antipolis, France. <sup>3</sup>Wellcome Sanger Institute, Hinxton, UK. <sup>4</sup>European Molecular Biology Laboratory, European Bioinformatics Institute, Hinxton, UK. <sup>5</sup>Science for Life Laboratory, Dept of Molecular Biosciences, Wenner-Gren Institute, Stockholm University, Stockholm, Sweden. <sup>6</sup>Systems Medicine, Deutsches Zentrum für Neurodegenerative Erkrankungen (DZNE), Bonn, Germany. <sup>7</sup>Dept of Pathology and Medical Biology, University of Groningen, University Medical Center Groningen, Groningen, The Netherlands. <sup>8</sup>GRIAC Research Institute at the University Medical Center Groningen, Groningen, The Netherlands. <sup>9</sup>Helmholtz Zentrum München, Institute of Lung Biology and Disease, Comprehensive Pneumology Center, Member of the German Center for Lung Research (DZL), Munich, Germany. <sup>10</sup>Science for Life Laboratory, Dept of Biochemistry and Biophysics, Stockholm University, Solna, Sweden. <sup>11</sup>Theory of Condensed Matter Group, Cavendish Laboratory, University of Cambridge, Cambridge, UK. <sup>12</sup>Dept of Pediatric Pulmonology and Pediatric Allergology, University of Groningen, University Medical Center Groningen, Beatrix Children's Hospital, Groningen, The Netherlands. <sup>13</sup>UMCG Research BV, University Medical Center Groningen, Groningen, The Netherlands. <sup>14</sup>Dept of Surgery, University of Cambridge and Cambridge NIHR Biomedical Research Centre, Cambridge, UK. <sup>15</sup>Dépt de Pneumologie, Université Côte d'Azur and CHU Nice, FHU-OncoAge, Nice, France. <sup>16</sup>European Lung Foundation, Sheffield, UK. <sup>17</sup>Science for Life Laboratory, Dept of Gene Technology, KTH Royal Institute of Technology, Solna, Sweden. <sup>18</sup>Dept of Pulmonology, University of Groningen, University Medical Center Groningen, Groningen, The Netherlands. <sup>19</sup>Synthetic and Systems Biology Unit, Biological Research Center, Szeged, Hungary. <sup>20</sup>PRECISE Platform for Single Cell Genomics and Epigenomics, Systems Medicine, Deutsches Zentrum für Neurodegenerative Erkrankungen (DZNE) and University of Bonn, Bonn, Germany. <sup>21</sup>Genomics and Immunoregulation, Life & Medical Sciences (LIMES) Institute, University of Bonn, Bonn, Germany. <sup>22</sup>A Beta World, Amsterdam, The Netherlands. <sup>23</sup>Division of Pulmonary and Critical Care Medicine, Feinberg School of Medicine, Northwestern University, Chicago, IL, USA. <sup>24</sup>Airway Disease Section, National Heart and Lung Institute, Faculty of Medicine, Imperial College London, London, UK. <sup>25</sup>Comma Soft AG, Bonn, Germany. <sup>26</sup>These authors made an equal contribution to this work.

Corresponding author: Martijn C. Nawijn ([m.c.nawijn@umcg.nl](mailto:m.c.nawijn@umcg.nl))

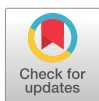

Shareable abstract (@ERSpublications)

The discovAIR project contributes to the Human Cell Atlas Lung Biological Network by establishing a first draft of the Human Lung Cell Atlas, advancing our insight into the cellular complexity and spatial organisation of the lung in health and disease <https://bit.ly/3zX4cad>

**Cite this article as:** Luecken MD, Zaragosi L-E, Madisson E, *et al.* The discovAIR project: a roadmap towards the Human Lung Cell Atlas. *Eur Respir J* 2022; 60: 2102057 [DOI: 10.1183/13993003.02057-2021].

This single-page version can be shared freely online.

## Abstract

The Human Cell Atlas (HCA) consortium aims to establish an atlas of all organs in the healthy human body at single-cell resolution to increase our understanding of basic biological processes that govern development, physiology and anatomy, and to accelerate diagnosis and treatment of disease. The Lung Biological Network of the HCA aims to generate the Human Lung Cell Atlas as a reference for the cellular repertoire, molecular cell states and phenotypes, and cell–cell interactions that characterise normal lung homeostasis in healthy lung tissue. Such a reference atlas of the healthy human lung will facilitate mapping the changes in the cellular landscape in disease. The discovAIR project is one of six pilot actions for the HCA funded by the European Commission in the context of the H2020 framework programme.

Copyright ©The authors 2022.

This version is distributed under the terms of the Creative Commons Attribution Non-Commercial Licence 4.0. For commercial reproduction rights and permissions contact [permissions@ersnet.org](mailto:permissions@ersnet.org)

Received: 26 July 2021  
Accepted: 23 Dec 2021

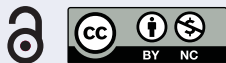

discovAIR aims to establish the first draft of an integrated Human Lung Cell Atlas, combining single-cell transcriptional and epigenetic profiling with spatially resolving techniques on matched tissue samples, as well as including a number of chronic and infectious diseases of the lung. The integrated Human Lung Cell Atlas will be available as a resource for the wider respiratory community, including basic and translational scientists, clinical medicine, and the private sector, as well as for patients with lung disease and the interested lay public. We anticipate that the Human Lung Cell Atlas will be the founding stone for a more detailed understanding of the pathogenesis of lung diseases, guiding the design of novel diagnostics and preventive or curative interventions.
